# Supplementary material for: Influenza A Virus on Oceanic Islands: Host and Viral Diversity in Seabirds in the Western Indian Ocean
Source: PubMed Central journal article supplement (PMC4440776; doi:10.1371/journal.ppat.1004925), 2015-05-21
Supplement: ppat.1004925.s001.pdf [file ppat.1004925.s001.pdf]

| Bird species                                          | Aride         | Bird                                                   | Cousin                              | Europa | Juan de Nova | Reunion | Tromelin |
|-------------------------------------------------------|---------------|--------------------------------------------------------|-------------------------------------|--------|--------------|---------|----------|
| Charadriiformes                                       |               |                                                        |                                     |        |              |         |          |
| Bridled tern ( <i>Sterna anaethetus</i> )             | 70-200        |                                                        | 580 <sup>c</sup>                    |        |              |         |          |
| Brown noddy ( <i>Anous stolidus</i> )                 | 1700-10400    | 10000 <sup>b</sup>                                     | 1700 <sup>e</sup>                   |        |              | 300     |          |
| Caspian tern ( <i>Hydropogone caspia</i> )            |               |                                                        |                                     | 10     |              |         |          |
| Crested tern ( <i>Thalasseus bergii</i> )             |               |                                                        |                                     |        | 250          |         |          |
| Lesser noddy ( <i>Anous tenuirostris</i> )            | 93000-193000  | 9000 <sup>c</sup>                                      | 71900-90000 <sup>d</sup>            |        |              |         |          |
| Roseate tern ( <i>Sterna dougalii</i> )               | 300-1650      |                                                        |                                     |        |              |         |          |
| Sooty tern ( <i>Onychoprion fuscatus</i> )            | 156000-437000 | 500000 <sup>a</sup>                                    |                                     | 760000 | 2000000      |         |          |
| White tern ( <i>Gygis alba</i> )                      | 5300-10400    | 500 <sup>a</sup>                                       | 1860-4080 <sup>d</sup>              |        |              |         | 3        |
| Suliformes                                            |               |                                                        |                                     |        |              |         |          |
| Greater frigatebird ( <i>Fregata minor</i> )          | 3000-4500*    |                                                        |                                     | 1100   |              |         |          |
| Lesser frigatebird ( <i>Fregata ariel</i> )           |               |                                                        |                                     | 1200   |              |         |          |
| Brown nooby ( <i>Sula leucogaster</i> )               |               |                                                        |                                     |        |              |         | 1        |
| Masked booby ( <i>Sula dactylatra</i> )               |               |                                                        |                                     |        |              |         | 1090     |
| Red-footed booby ( <i>Sula sula</i> )                 |               |                                                        |                                     | 3000   |              |         | 855      |
| Phaethontiformes                                      |               |                                                        |                                     |        |              |         |          |
| Red-tailed tropicbird ( <i>Phaethon rubricauda</i> )  | 2-5           |                                                        |                                     | 3500   |              |         |          |
| White-tailed tropicbird ( <i>Phaethon lepturus</i> )  | 600-1500      | 30 <sup>a</sup>                                        | 860-1540 <sup>d</sup>               | 1000   |              | 2020    |          |
| Procellariiformes                                     |               |                                                        |                                     |        |              |         |          |
| Wedge-tailed shearwater ( <i>Puffinus pacificus</i> ) | 19500         | 500 <sup>a</sup>                                       | 9250-16900 <sup>d</sup>             |        |              | 1000    |          |
| Tropical shearwater ( <i>Puffinus lherminieri</i> )   | 57000         |                                                        | 7550 <sup>e</sup>                   | 50     |              | 3000    |          |
| Mascarene petrel ( <i>Pseudobulweria aterrima</i> )   |               |                                                        |                                     |        |              | 50      |          |
| Barau's petrel ( <i>Pterodroma baraui</i> )           |               |                                                        |                                     |        |              | 5000    |          |
| References                                            | [1]           | <sup>a</sup> [2] ; <sup>b</sup> [3] ; <sup>c</sup> [4] | <sup>d</sup> [5] ; <sup>e</sup> [6] | [7]    | [7]          | [6]     | [8]      |

\* includes both Frigatebird species.

## References

1. Bowler J, Betts M, Bullock I, Ramos JA. Trends in seabird numbers on Aride Island Nature Reserve, Seychelles 1988-2000. *Waterbirds*. 2002;25: 26-38.
2. Feare CJ. Unpublished data. 2014.
3. Feare CJ. The ecology of Bird Island, Seychelles. *Atoll Res Bull*. 1979;226: 1-29.
4. Bristol R. Unpublished data. 2002.
5. Rocamora G, Skerrett A. Seychelles. In Fishpool LDC, Evans MI (editors). Important bird areas in Africa and associated islands. Cambridge, UK: BirdLife International. 2001; 751-768.
6. Le Corre M. Unpublished data. 2007.
7. Le Corre M, Jaquemet S. Assessment of the seabird community of the Mozambique Channel and its potential use as an indicator of tuna abundance. *Estuar Coast Shelf Sci*. 2005;63: 421-428.
8. Le Corre M, Danckwerts DK, Ringler D, Bastien M, Orłowski S, Rubio CM, et al. Seabird recovery and vegetation dynamics after Norway rat eradication at Tromelin Island, Western Indian Ocean. *Biol Cons*. 2015;185: 85-94.
