# Supplementary material for: Influenza A Virus on Oceanic Islands: Host and Viral Diversity in Seabirds in the Western Indian Ocean
Source: PubMed Central journal article supplement (PMC4440776; doi:10.1371/journal.ppat.1004925), 2015-05-21

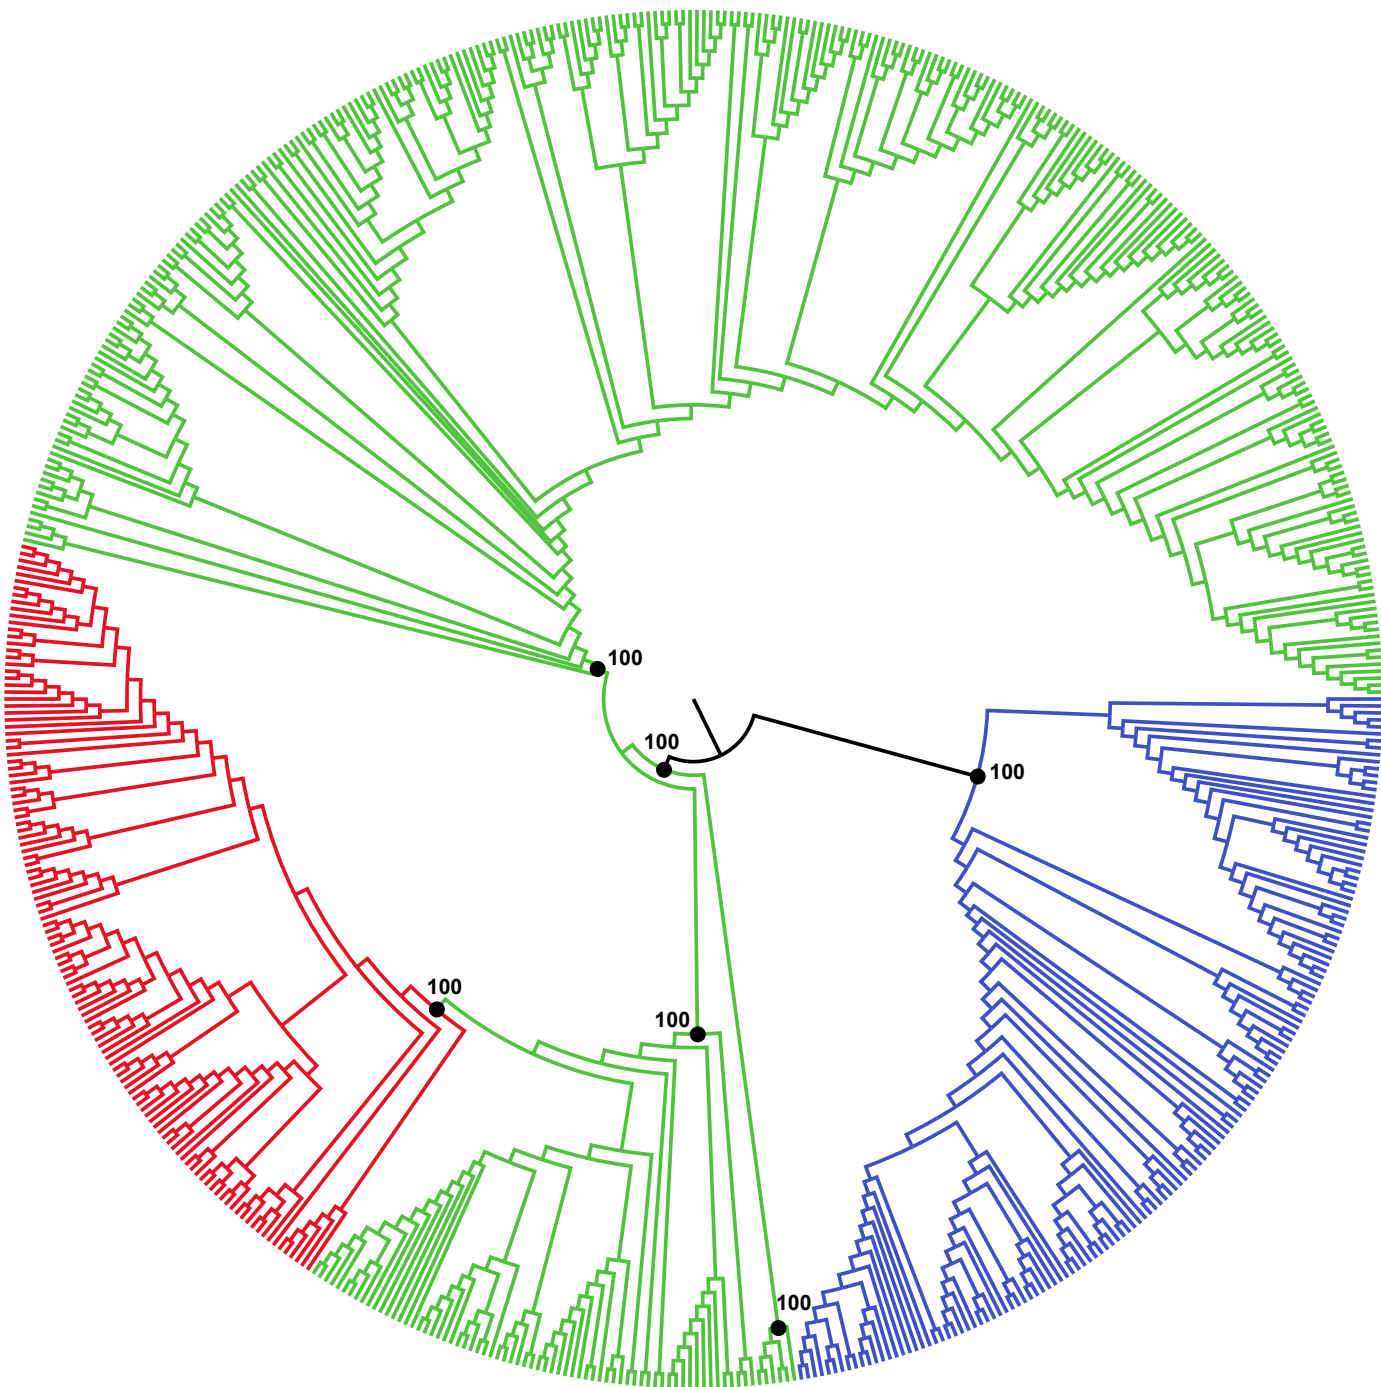

Supplement: ppat.1004925.s005.pdf [file ppat.1004925.s005.pdf]
